# Supplementary material
Source: publisher figshare collection journal article supplement (https://sage.figshare.com/ndownloader/files/18018158)
Supplement: Supplementary file 1 [file 18018158]

### Supplementary Materials

Table A1. Item-level statistics for factor analysis on RCI, including means, standard deviations, and communalities.

| Item                                                                                                   | M (SD)      | Communalities |
|--------------------------------------------------------------------------------------------------------|-------------|---------------|
| 1. I often read books and magazines about my faith.                                                    | 2.15 (1.35) | 0.63          |
| 2. I make financial contributions to my religious organization.                                        | 2.11 (1.38) | 0.68          |
| 3. I spend time trying to grow in understanding of my faith.                                           | 2.37 (1.38) | 0.76          |
| 4. Religion is especially important to me because it answers many questions about the meaning of life. | 2.64 (1.52) | 0.84          |
| 5. My religious beliefs lie behind my whole approach to life.                                          | 2.60 (1.53) | 0.84          |
| 6. I enjoy spending time with others of my religious affiliation.                                      | 2.52 (1.46) | 0.71          |
| 7. Religious beliefs influence all my dealings in life.                                                | 2.39 (1.48) | 0.83          |
| 8. It is important to me to spend periods of time in private religious thought and reflection.         | 2.48 (1.49) | 0.76          |
| 9. I enjoy working in the activities of my religious affiliation.                                      | 2.11 (1.37) | 0.76          |
| 10. I keep well informed about my local religious group and have some influence in its decisions.      | 1.96 (1.27) | 0.61          |

*Note: Covariances and constrained path loadings marked by 'X'.*

### A. Religiosity

[illegible]

## B. Prohedonic Motives

| Item                                                                       | Path loading<br>constrained? | Covariance between error terms? |   |   |   |   |   |
|----------------------------------------------------------------------------|------------------------------|---------------------------------|---|---|---|---|---|
|                                                                            |                              | 1                               | 2 | 3 | 4 | 5 | 6 |
| 1. I try to think good thoughts no matter how badly I feel.                |                              | -                               |   |   |   |   |   |
| 2. Although I am sometimes sad, I have a mostly optimistic outlook.        | X                            |                                 | - |   |   |   |   |
| 3. When I am upset I realize that the "good things in life" are illusions. |                              |                                 | X | - |   |   |   |
| 4. When I become upset I remind myself of all the pleasures in life.       |                              |                                 |   |   | - |   |   |
| 5. Although I am sometimes happy, I have a mostly pessimistic outlook.     | X                            |                                 | X | X |   | - |   |
| 6. No matter how badly I feel, I try to think about pleasant things.       |                              |                                 |   |   |   |   | - |

## C. Beliefs about controllability of emotion

| Item                                                                                    | Path loading<br>constrained? | Covariance between error terms? |   |   |   |
|-----------------------------------------------------------------------------------------|------------------------------|---------------------------------|---|---|---|
|                                                                                         |                              | 1                               | 2 | 3 | 4 |
| 1. No matter how hard they try, people can't really change the emotions that they have. |                              | -                               |   |   |   |
| 2. Everyone can learn to control their emotions.                                        |                              |                                 | - |   |   |
| 3. The truth is, people have very little control over their emotions.                   | X                            |                                 |   | - |   |
| 4. If they want to, people can change the emotions that they have.                      |                              |                                 |   |   | - |

#### D. Self-efficacy beliefs

| Item                                                                    | Path loading<br>constrained? | Covariance between error terms? |   |   |   |
|-------------------------------------------------------------------------|------------------------------|---------------------------------|---|---|---|
|                                                                         |                              | 1                               | 2 | 3 | 4 |
| 1. No matter how hard I try, I can't really change the emotions I have. |                              | -                               |   |   |   |
| 2. I can learn to control my emotions.                                  |                              |                                 | - |   |   |
| 3. If I want to, I can change the emotions I have.                      | X                            |                                 |   | - |   |
| 4. The truth is, I have very little control over my emotions.           |                              | X                               |   |   | - |

#### E. Instrumental social support

| Item                                                                    | Path loading<br>constrained? | Covariance between error terms? |   |   |   |
|-------------------------------------------------------------------------|------------------------------|---------------------------------|---|---|---|
|                                                                         |                              | 1                               | 2 | 3 | 4 |
| 1. I try to get advice from someone about what to do.                   |                              | -                               |   |   |   |
| 2. I talk to someone to find out more about the situation.              |                              |                                 | - |   |   |
| 3. I talk to someone who could do something concrete about the problem. |                              |                                 |   | - |   |
| 4. I ask people who have had similar experiences what they did.         |                              |                                 |   |   | - |

## F. Emotional Social Support

| Item                                                         | Path loading<br>constrained? | Covariance between error terms? |   |   |   |
|--------------------------------------------------------------|------------------------------|---------------------------------|---|---|---|
|                                                              |                              | 1                               | 2 | 3 | 4 |
| 1. I discuss my feelings with someone.                       |                              | -                               |   |   |   |
| 2. I try to get emotional support from friends or relatives. |                              |                                 | - |   |   |
| 3. I get sympathy and understanding from someone.            | X                            |                                 |   | - |   |
| 4. I talk to someone about how I feel.                       |                              |                                 |   |   | - |

## G. Cognitive reappraisal

| Item                                                                                                                      | Path loading<br>constrained? | Covariance between error terms? |   |   |   |   |   |
|---------------------------------------------------------------------------------------------------------------------------|------------------------------|---------------------------------|---|---|---|---|---|
|                                                                                                                           |                              | 1                               | 2 | 3 | 4 | 5 | 6 |
| 1. When I want to feel more <i>positive</i> emotion (such as joy or amusement), I <i>change what I'm thinking about</i> . |                              | -                               |   |   |   |   |   |
| 2. When I want to feel less <i>negative</i> emotion (such as sadness or anger), I <i>change what I'm thinking about</i> . |                              | X                               | - |   |   |   |   |
| 3. When I'm faced with a stressful situation, I make myself <i>think about it</i> in a way that helps me stay calm.       |                              | X                               |   | - |   |   |   |
| 4. When I want to feel more <i>positive</i> emotion, I <i>change the way I'm thinking about</i> the situation.            |                              |                                 |   | X | - |   |   |
| 5. I control my emotions by <i>changing the way I think about</i> the situation I'm in.                                   | X                            |                                 | X |   |   | - |   |
| 6. When I want to feel less <i>negative</i> emotion, I <i>change the way I'm thinking about</i> the situation.            | X                            |                                 |   |   |   |   | - |

#### H. Positive re-interpretation & growth

| Item                                                                    | Path loading<br>constrained? | Covariance between error terms? |   |   |   |
|-------------------------------------------------------------------------|------------------------------|---------------------------------|---|---|---|
|                                                                         |                              | 1                               | 2 | 3 | 4 |
| 1. I try to grow as a person as a result of the experience.             | X                            | -                               |   |   |   |
| 2. I try to see it in a different light, to make it seem more positive. |                              |                                 | - |   |   |
| 3. I look for something good in what is happening.                      |                              |                                 | X | - |   |
| 4. I learn something from the experience.                               |                              |                                 |   |   | - |

#### I. Acceptance

| Item                                                             | Path loading<br>constrained? | Covariance between error terms? |   |   |   |
|------------------------------------------------------------------|------------------------------|---------------------------------|---|---|---|
|                                                                  |                              | 1                               | 2 | 3 | 4 |
| 1. I get used to the idea that it happened.                      |                              | -                               |   |   |   |
| 2. I accept that this has happened and that it can't be changed. |                              |                                 | - |   |   |
| 3. I accept the reality of the fact that it happened.            | X                            |                                 |   | - |   |
| 4. I learn to live with it.                                      |                              | X                               |   |   | - |

## J. Non-judgmentalism

| Item                                                                               | Path loading<br>constrained? | Covariance between error terms? |   |   |   |   |
|------------------------------------------------------------------------------------|------------------------------|---------------------------------|---|---|---|---|
|                                                                                    |                              | 1                               | 2 | 3 | 4 | 5 |
| 1. I tell myself that I shouldn't be feeling the way I'm feeling.                  |                              | -                               |   |   |   |   |
| 2. I make judgments about whether my thoughts are good or bad.                     |                              |                                 | - |   |   |   |
| 3. I tell myself I shouldn't be thinking the way I'm thinking.                     | X                            |                                 |   | - |   |   |
| 4. I think some of my emotions are bad or inappropriate and I shouldn't feel them. |                              |                                 |   |   | - |   |
| 5. I disapprove of myself when I have illogical ideas.                             |                              |                                 |   |   | X | - |

## K. Rumination

| Item                                                                                            | Path loading<br>constrained? | Covariance between error terms? |   |   |   |   |   |
|-------------------------------------------------------------------------------------------------|------------------------------|---------------------------------|---|---|---|---|---|
|                                                                                                 |                              | 1                               | 2 | 3 | 4 | 5 | 6 |
| 1. My attention is often focused on aspects of myself I wish I'd stop thinking about            |                              | -                               |   |   |   |   |   |
| 2. Sometimes it is hard for me to shut off thoughts about myself                                |                              | X                               | - |   |   |   |   |
| 3. I tend to "ruminate" or dwell over things that happen to me for a really long time afterward |                              | X                               | X | - |   |   |   |
| 4. I don't waste time re-thinking things that are over and done with                            | X                            | X                               | X |   | - |   |   |
| 5. I never ruminate or dwell on myself for very long                                            |                              |                                 |   |   | X | - |   |
| 6. It is easy for me to put unwanted thoughts out of my mind                                    | X                            |                                 |   |   |   |   | - |





#### L. Expressive suppression

| Item                                                                             | Path loading<br>constrained? | Covariance between error terms? |   |   |   |
|----------------------------------------------------------------------------------|------------------------------|---------------------------------|---|---|---|
|                                                                                  |                              | 1                               | 2 | 3 | 4 |
| 1. I keep my emotions to myself.                                                 |                              | -                               |   |   |   |
| 2. When I am feeling <i>positive</i> emotions, I am careful not to express them. | X                            |                                 | - |   |   |
| 3. I control my emotions by <i>not expressing them</i> .                         |                              |                                 |   | - |   |
| 4. When I am feeling <i>negative</i> emotions, I make sure not to express them.  |                              |                                 | X |   | - |

#### M. Distraction

| Item                                      | Path loading<br>constrained? | Covariance between error terms? |   |   |   |   |   |
|-------------------------------------------|------------------------------|---------------------------------|---|---|---|---|---|
|                                           |                              | 1                               | 2 | 3 | 4 | 5 | 6 |
| 1. I call to mind positive images instead |                              | -                               |   |   |   |   |   |
| 2. I occupy myself with work instead      | X                            |                                 | - |   |   |   |   |
| 3. I think pleasant thoughts instead      | X                            | X                               |   | - |   |   |   |
| 4. I do something I enjoy                 |                              |                                 |   |   | - |   |   |
| 5. I think about something else           |                              |                                 |   |   |   | - |   |
| 6. I keep myself busy                     |                              | X                               | X | X |   |   | - |

#### N. Mental disengagement

| Item                                                                         | Path loading<br>constrained? | Covariance between error terms? |   |   |   |
|------------------------------------------------------------------------------|------------------------------|---------------------------------|---|---|---|
|                                                                              |                              | 1                               | 2 | 3 | 4 |
| 1. I turn to work or other substitute activities to take my mind off things. |                              | -                               |   |   |   |
| 2. I daydream about things other than this.                                  | X                            |                                 | - |   |   |
| 3. I sleep more than usual.                                                  |                              |                                 |   | - |   |
| 4. I go to movies or watch TV, to think about it less.                       |                              |                                 |   |   | - |

#### O. Experiential Avoidance

| Item                                                                                               | Path loading<br>constrained? | Covariance between error terms? |   |   |   |   |   |   |
|----------------------------------------------------------------------------------------------------|------------------------------|---------------------------------|---|---|---|---|---|---|
|                                                                                                    |                              | 1                               | 2 | 3 | 4 | 5 | 6 | 7 |
| 1. My painful experiences and memories make it difficult for me to live a life that I would value. |                              | -                               |   |   |   |   |   |   |
| 2. I'm afraid of my feelings.                                                                      |                              |                                 | - |   |   |   |   |   |
| 3. I worry about not being able to control my worries and feelings.                                |                              |                                 |   | - |   |   |   |   |
| 4. My painful memories prevent me from having a fulfilling life.                                   | X                            | X                               |   |   | - |   |   |   |
| 5. Emotions cause problems in my life.                                                             |                              |                                 |   |   |   | - |   |   |
| 6. It seems like most people are handling their lives better than I am.                            |                              |                                 |   |   |   |   | - |   |
| 7. Worries get in the way of my success                                                            |                              |                                 |   |   |   |   | X | - |

P. Behavioral avoidance

| Item                                                                                              | Path loading<br>constrained? | Covariance between error terms? |   |   |   |   |   |   |   |
|---------------------------------------------------------------------------------------------------|------------------------------|---------------------------------|---|---|---|---|---|---|---|
|                                                                                                   |                              | 1                               | 2 | 3 | 4 | 5 | 6 | 7 | 8 |
| 1. I avoid attending social activities.                                                           |                              | -                               |   |   |   |   |   |   |   |
| 2. I do not answer the phone in case people are calling with social invitations.                  | X                            |                                 | - |   |   |   |   |   |   |
| 3. I do not go out to events when I know there will be a lot of people I do not know.             |                              |                                 |   | - |   |   |   |   |   |
| 4. Instead of thinking about problems in my social life, I tell myself that I prefer to be alone. |                              |                                 |   |   | - |   |   |   |   |
| 5. I find that I often want to leave social gatherings.                                           |                              |                                 |   |   |   | - |   |   |   |
| 6. I tend to make up excuses to get out of social activities.                                     |                              |                                 |   |   |   |   | - |   |   |
| 7. I turn down opportunities to socialize with the opposite sex.                                  |                              |                                 |   |   |   |   |   | - |   |
| 8. I tend to remain to myself during social gatherings or activities.                             | X                            |                                 |   |   |   | X |   |   | - |

Table A3. *Predicting elements of emotion regulation with the Interpersonal Subscale of the RCI.*

A.

|                                  | Prohedonic motives |      | Beliefs about controllability of emotion |      | Self-efficacy |      | Instrumental social support |      | Emotional social support |      |
|----------------------------------|--------------------|------|------------------------------------------|------|---------------|------|-----------------------------|------|--------------------------|------|
|                                  | Coeff.             | SE   | Coeff.                                   | SE   | Coeff.        | SE   | Coeff.                      | SE   | Coeff.                   | SE   |
| Interpersonal Religiosity        | 0.12**             | 0.04 | 0.12**                                   | 0.04 | 0.13**        | 0.04 | 0.12**                      | 0.04 | 0.12**                   | 0.04 |
| Age                              | 0.13***            | 0.04 | -0.01                                    | 0.04 | 0.00          | 0.04 | -0.08*                      | 0.04 | -0.04                    | 0.04 |
| Gender                           | 0.15+              | 0.08 | 0.01                                     | 0.08 | -0.07         | 0.08 | 0.25**                      | 0.08 | 0.42***                  | 0.08 |
| Socioeconomic                    | 0.21***            | 0.04 | 0.05                                     | 0.04 | 0.10*         | 0.04 | 0.04                        | 0.04 | 0.07+                    | 0.04 |
| Israel (effect coded)            | -0.10              | 0.17 | -0.35*                                   | 0.18 | -0.16         | 0.18 | -0.08                       | 0.18 | -0.19                    | 0.18 |
| Turkey (effect coded)            | -0.07              | 0.17 | 0.01                                     | 0.17 | -0.16         | 0.17 | 0.43*                       | 0.17 | 0.38*                    | 0.17 |
| Interpersonal Religiosity*Israel | 0.05               | 0.05 | 0.20***                                  | 0.06 | 0.15*         | 0.06 | -0.01                       | 0.06 | -0.05                    | 0.06 |
| Interpersonal Religiosity*Turkey | -0.08              | 0.06 | -0.21***                                 | 0.06 | -0.18**       | 0.06 | -0.01                       | 0.06 | 0.06                     | 0.06 |
| Age*Israel                       | -0.09+             | 0.05 | 0.04                                     | 0.06 | -0.01         | 0.06 | 0.01                        | 0.06 | 0.03                     | 0.05 |
| Age*Turkey                       | 0.00               | 0.05 | -0.06                                    | 0.06 | -0.01         | 0.06 | 0.02                        | 0.06 | -0.03                    | 0.05 |
| Gender*Israel                    | 0.18               | 0.11 | 0.24*                                    | 0.11 | 0.15          | 0.11 | 0.15                        | 0.11 | 0.26*                    | 0.11 |
| Gender*Turkey                    | -0.10              | 0.11 | -0.10                                    | 0.12 | 0.01          | 0.12 | -0.22+                      | 0.11 | -0.27*                   | 0.11 |
| Socioeconomic*Israel             | 0.06               | 0.05 | -0.08                                    | 0.06 | 0.00          | 0.06 | -0.06                       | 0.06 | -0.01                    | 0.06 |
| Socioeconomic*Turkey             | -0.13*             | 0.06 | -0.08                                    | 0.06 | -0.12*        | 0.06 | -0.04                       | 0.06 | -0.08                    | 0.06 |
| R <sup>2</sup>                   | 0.14               |      | 0.08                                     |      | 0.07          |      | 0.08                        |      | 0.11                     |      |

Note: + $p < .10$ , \* $p < .05$ , \*\* $p < .01$ , \*\*\* $p < .001$

## B.

|                                  | Cognitive reappraisal |      | Positive re-interpretation & growth |      | Acceptance |      | Non-judgmentalism |      | Rumination |      |
|----------------------------------|-----------------------|------|-------------------------------------|------|------------|------|-------------------|------|------------|------|
|                                  | Coeff.                | SE   | Coeff.                              | SE   | Coeff.     | SE   | Coeff.            | SE   | Coeff.     | SE   |
| Interpersonal Religiosity        | 0.16***               | 0.04 | 0.12**                              | 0.04 | 0.12**     | 0.04 | -0.06             | 0.04 | -0.10*     | 0.04 |
| Age                              | 0.08*                 | 0.04 | 0.02                                | 0.04 | 0.04       | 0.04 | 0.13***           | 0.04 | -0.21***   | 0.04 |
| Gender                           | 0.15+                 | 0.08 | 0.05                                | 0.08 | 0.00       | 0.08 | -0.13+            | 0.07 | 0.12       | 0.08 |
| Socioeconomic                    | 0.12**                | 0.04 | 0.15***                             | 0.04 | 0.08+      | 0.04 | 0.07*             | 0.04 | -0.15***   | 0.04 |
| Israel (effect coded)            | -0.17                 | 0.18 | -0.16                               | 0.18 | -0.07      | 0.18 | 0.25              | 0.16 | 0.28       | 0.18 |
| Turkey (effect coded)            | -0.17                 | 0.17 | 0.34*                               | 0.17 | -0.34*     | 0.18 | -0.56***          | 0.16 | 0.07       | 0.17 |
| Interpersonal Religiosity*Israel | -0.07                 | 0.06 | 0.07                                | 0.06 | 0.14*      | 0.06 | 0.04              | 0.05 | -0.05      | 0.06 |
| Interpersonal Religiosity*Turkey | 0.06                  | 0.06 | -0.07                               | 0.06 | -0.07      | 0.06 | -0.11*            | 0.05 | 0.03       | 0.06 |
| Age*Israel                       | -0.06                 | 0.06 | -0.10+                              | 0.06 | 0.03       | 0.06 | -0.07             | 0.05 | 0.02       | 0.05 |
| Age*Turkey                       | 0.03                  | 0.06 | -0.03                               | 0.06 | -0.09      | 0.06 | -0.07             | 0.05 | 0.03       | 0.05 |
| Gender*Israel                    | 0.05                  | 0.11 | 0.14                                | 0.11 | 0.06       | 0.11 | 0.03              | 0.1  | -0.06      | 0.11 |
| Gender*Turkey                    | 0.06                  | 0.11 | -0.15                               | 0.11 | 0.14       | 0.12 | -0.05             | 0.1  | -0.05      | 0.11 |
| Socioeconomic*Israel             | 0.10+                 | 0.06 | 0.01                                | 0.06 | -0.03      | 0.06 | 0.09+             | 0.05 | -0.03      | 0.06 |
| Socioeconomic*Turkey             | -0.10+                | 0.06 | -0.07                               | 0.06 | -0.06      | 0.06 | -0.17**           | 0.05 | 0.07       | 0.06 |
| R <sup>2</sup>                   | 0.08                  |      | 0.08                                |      | 0.06       |      | 0.25              |      | 0.11       |      |

Note: + $p < .10$ , \* $p < .05$ , \*\* $p < .01$ , \*\*\* $p < .001$

C.

|                                  | Expressive suppression |      | Distraction |      | Mental disengagement |      | Experiential avoidance |      | Behavioral avoidance |      |
|----------------------------------|------------------------|------|-------------|------|----------------------|------|------------------------|------|----------------------|------|
|                                  | Coeff.                 | SE   | Coeff.      | SE   | Coeff.               | SE   | Coeff.                 | SE   | Coeff.               | SE   |
| Interpersonal Religiosity        | 0.06                   | 0.04 | 0.19***     | 0.04 | 0.02                 | 0.04 | -0.09*                 | 0.04 | -0.08*               | 0.04 |
| Age                              | -0.02                  | 0.04 | 0.03        | 0.04 | -0.12**              | 0.04 | -0.16***               | 0.04 | -0.08*               | 0.04 |
| Gender                           | -0.30***               | 0.08 | 0.20*       | 0.08 | 0.23**               | 0.08 | 0.16*                  | 0.08 | -0.08                | 0.08 |
| Socioeconomic                    | -0.04                  | 0.04 | 0.08*       | 0.04 | -0.07+               | 0.04 | -0.15***               | 0.04 | -0.15***             | 0.04 |
| Israel (effect coded)            | -0.04                  | 0.18 | -0.22       | 0.18 | -0.21                | 0.18 | -0.04                  | 0.17 | -0.19                | 0.18 |
| Turkey (effect coded)            | 0.08                   | 0.17 | 0.15        | 0.17 | 0.34*                | 0.17 | 0.07                   | 0.16 | 0.01                 | 0.17 |
| Interpersonal Religiosity*Israel | 0.02                   | 0.06 | -0.06       | 0.06 | -0.09                | 0.06 | -0.03                  | 0.05 | 0.10+                | 0.06 |
| Interpersonal Religiosity*Turkey | 0.12*                  | 0.06 | 0.08        | 0.06 | 0.11*                | 0.06 | 0.04                   | 0.05 | 0.07                 | 0.06 |
| Age*Israel                       | 0.06                   | 0.06 | -0.09       | 0.06 | 0.06                 | 0.05 | 0.12*                  | 0.05 | 0.10+                | 0.05 |
| Age*Turkey                       | 0.01                   | 0.06 | 0.12*       | 0.06 | 0.11*                | 0.05 | -0.04                  | 0.05 | -0.06                | 0.05 |
| Gender*Israel                    | -0.08                  | 0.11 | 0.06        | 0.11 | 0.03                 | 0.11 | -0.14                  | 0.11 | -0.03                | 0.11 |
| Gender*Turkey                    | 0.15                   | 0.11 | 0.01        | 0.11 | 0.03                 | 0.11 | 0.23*                  | 0.11 | 0.03                 | 0.11 |
| Socioeconomic*Israel             | -0.02                  | 0.06 | 0.09        | 0.06 | -0.11*               | 0.06 | -0.14**                | 0.05 | -0.16**              | 0.06 |
| Socioeconomic*Turkey             | 0.01                   | 0.06 | -0.18**     | 0.06 | 0.07                 | 0.06 | 0.24***                | 0.05 | 0.18**               | 0.06 |
| R <sup>2</sup>                   | 0.11                   |      | 0.09        |      | 0.12                 |      | 0.18                   |      | 0.12                 |      |

Note: + $p < .10$ , \* $p < .05$ , \*\* $p < .01$ , \*\*\* $p < .001$

Table A4. *Predicting elements of emotion regulation with the Intrapersonal Subscale of the RCI.*

A.

|                                  | Prohedonic motives |      | Beliefs about controllability of emotion |      | Self-efficacy |      | Instrumental social support |      | Emotional social support |      |
|----------------------------------|--------------------|------|------------------------------------------|------|---------------|------|-----------------------------|------|--------------------------|------|
|                                  | Coeff.             | SE   | Coeff.                                   | SE   | Coeff.        | SE   | Coeff.                      | SE   | Coeff.                   | SE   |
| Intrapersonal Religiosity        | 0.12**             | 0.04 | 0.07+                                    | 0.04 | 0.12**        | 0.04 | 0.13**                      | 0.04 | 0.10*                    | 0.04 |
| Age                              | 0.12**             | 0.04 | -0.01                                    | 0.04 | 0.01          | 0.04 | -0.08*                      | 0.04 | -0.04                    | 0.04 |
| Gender                           | 0.14+              | 0.08 | 0.00                                     | 0.08 | -0.08         | 0.08 | 0.25**                      | 0.08 | 0.41***                  | 0.08 |
| Socioeconomic                    | 0.22***            | 0.04 | 0.06                                     | 0.04 | 0.11**        | 0.04 | 0.05                        | 0.04 | 0.08*                    | 0.04 |
| Israel (effect coded)            | -0.12              | 0.17 | -0.35+                                   | 0.18 | -0.17         | 0.18 | -0.10                       | 0.18 | -0.19                    | 0.18 |
| Turkey (effect coded)            | -0.09              | 0.17 | 0.00                                     | 0.17 | -0.17         | 0.17 | 0.43*                       | 0.17 | 0.38*                    | 0.17 |
| Intrapersonal Religiosity*Israel | 0.03               | 0.06 | 0.21***                                  | 0.06 | 0.17**        | 0.06 | 0.00                        | 0.06 | -0.03                    | 0.06 |
| Intrapersonal Religiosity*Turkey | -0.12*             | 0.06 | -0.20***                                 | 0.06 | -0.19***      | 0.06 | 0.01                        | 0.06 | 0.05                     | 0.06 |
| Age*Israel                       | -0.08              | 0.05 | 0.05                                     | 0.06 | 0.00          | 0.06 | 0.01                        | 0.06 | 0.04                     | 0.06 |
| Age*Turkey                       | 0.00               | 0.05 | -0.07                                    | 0.06 | -0.01         | 0.06 | 0.02                        | 0.06 | -0.03                    | 0.06 |
| Gender*Israel                    | 0.19+              | 0.11 | 0.24*                                    | 0.11 | 0.16          | 0.11 | 0.16                        | 0.11 | 0.27*                    | 0.11 |
| Gender*Turkey                    | -0.09              | 0.11 | -0.10                                    | 0.12 | 0.02          | 0.12 | -0.22+                      | 0.11 | -0.27*                   | 0.11 |
| Socioeconomic*Israel             | 0.06               | 0.05 | -0.08                                    | 0.06 | 0.00          | 0.06 | -0.06                       | 0.06 | -0.01                    | 0.06 |
| Socioeconomic*Turkey             | -0.12*             | 0.06 | -0.09                                    | 0.06 | -0.13*        | 0.06 | -0.05                       | 0.06 | -0.08                    | 0.06 |
| R <sup>2</sup>                   | 0.14               |      | 0.07                                     |      | 0.07          |      | 0.08                        |      | 0.11                     |      |

Note: + $p < .10$ , \* $p < .05$ , \*\* $p < .01$ , \*\*\* $p < .001$

## B.

|                                  | Cognitive reappraisal |      | Positive re-interpretation & growth |      | Acceptance |      | Non-judgmentalism |      | Rumination |      |
|----------------------------------|-----------------------|------|-------------------------------------|------|------------|------|-------------------|------|------------|------|
|                                  | Coeff.                | SE   | Coeff.                              | SE   | Coeff.     | SE   | Coeff.            | SE   | Coeff.     | SE   |
| Intrapersonal Religiosity        | 0.15***               | 0.04 | 0.15***                             | 0.04 | 0.10*      | 0.04 | -0.08*            | 0.04 | -0.08*     | 0.04 |
| Age                              | 0.07+                 | 0.04 | 0.02                                | 0.04 | 0.05       | 0.04 | 0.13***           | 0.04 | -0.21***   | 0.04 |
| Gender                           | 0.14+                 | 0.08 | 0.04                                | 0.08 | -0.01      | 0.08 | -0.14+            | 0.07 | 0.12       | 0.08 |
| Socioeconomic                    | 0.12**                | 0.04 | 0.15***                             | 0.04 | 0.08*      | 0.04 | 0.07*             | 0.04 | -0.16***   | 0.04 |
| Israel (effect coded)            | -0.18                 | 0.18 | -0.18                               | 0.18 | -0.07      | 0.18 | 0.27+             | 0.16 | 0.29       | 0.18 |
| Turkey (effect coded)            | -0.18                 | 0.17 | 0.32+                               | 0.17 | -0.35*     | 0.18 | -0.56***          | 0.16 | 0.07       | 0.17 |
| Intrapersonal Religiosity*Israel | -0.08                 | 0.06 | 0.03                                | 0.06 | 0.14*      | 0.06 | 0.02              | 0.05 | -0.06      | 0.06 |
| Intrapersonal Religiosity*Turkey | 0.06                  | 0.06 | -0.07                               | 0.06 | -0.09      | 0.06 | -0.09+            | 0.05 | 0.06       | 0.06 |
| Age*Israel                       | -0.05                 | 0.06 | -0.09                               | 0.06 | 0.04       | 0.06 | -0.08             | 0.05 | 0.01       | 0.06 |
| Age*Turkey                       | 0.03                  | 0.06 | -0.03                               | 0.06 | -0.10+     | 0.06 | -0.07             | 0.05 | 0.03       | 0.05 |
| Gender*Israel                    | 0.05                  | 0.11 | 0.15                                | 0.11 | 0.06       | 0.12 | 0.02              | 0.1  | -0.06      | 0.11 |
| Gender*Turkey                    | 0.07                  | 0.11 | -0.13                               | 0.11 | 0.14       | 0.12 | -0.04             | 0.1  | -0.05      | 0.11 |
| Socioeconomic*Israel             | 0.09                  | 0.06 | 0.02                                | 0.06 | -0.03      | 0.06 | 0.08              | 0.05 | -0.03      | 0.06 |
| Socioeconomic*Turkey             | -0.10+                | 0.06 | -0.08                               | 0.06 | -0.06      | 0.06 | -0.17**           | 0.05 | 0.07       | 0.06 |
| R <sup>2</sup>                   | 0.08                  |      | 0.08                                |      | 0.05       |      | 0.25              |      | 0.11       |      |

Note: + $p < .10$ , \* $p < .05$ , \*\* $p < .01$ , \*\*\* $p < .001$



C.

|                                  | Expressive suppression |      | Distraction |      | Mental disengagement |      | Experiential avoidance |      | Behavioral avoidance |      |
|----------------------------------|------------------------|------|-------------|------|----------------------|------|------------------------|------|----------------------|------|
|                                  | Coeff.                 | SE   | Coeff.      | SE   | Coeff.               | SE   | Coeff.                 | SE   | Coeff.               | SE   |
| Intrapersonal Religiosity        | 0.08*                  | 0.04 | 0.16***     | 0.04 | 0.01                 | 0.04 | -0.04                  | 0.04 | -0.03                | 0.04 |
| Age                              | -0.02                  | 0.04 | 0.02        | 0.04 | -0.12**              | 0.04 | -0.16***               | 0.04 | -0.08*               | 0.04 |
| Gender                           | -0.29***               | 0.08 | 0.19*       | 0.08 | 0.23**               | 0.08 | 0.17*                  | 0.08 | -0.06                | 0.08 |
| Socioeconomic                    | -0.04                  | 0.04 | 0.09*       | 0.04 | -0.07+               | 0.04 | -0.16***               | 0.04 | -0.15***             | 0.04 |
| Israel (effect coded)            | -0.04                  | 0.18 | -0.21       | 0.18 | -0.22                | 0.18 | -0.04                  | 0.17 | -0.20                | 0.18 |
| Turkey (effect coded)            | 0.09                   | 0.17 | 0.14        | 0.17 | 0.35*                | 0.17 | 0.07                   | 0.16 | 0.03                 | 0.17 |
| Intrapersonal Religiosity*Israel | 0.01                   | 0.06 | -0.10+      | 0.06 | -0.06                | 0.06 | -0.06                  | 0.05 | 0.13*                | 0.06 |
| Intrapersonal Religiosity*Turkey | 0.14*                  | 0.06 | 0.09        | 0.06 | 0.07                 | 0.06 | 0.07                   | 0.05 | 0.05                 | 0.06 |
| Age*Israel                       | 0.07                   | 0.06 | -0.08       | 0.06 | 0.06                 | 0.05 | 0.11*                  | 0.05 | 0.10+                | 0.05 |
| Age*Turkey                       | 0.00                   | 0.05 | 0.11*       | 0.06 | 0.11*                | 0.05 | -0.03                  | 0.05 | -0.07                | 0.05 |
| Gender*Israel                    | -0.08                  | 0.11 | 0.06        | 0.11 | 0.04                 | 0.11 | -0.14                  | 0.11 | -0.03                | 0.11 |
| Gender*Turkey                    | 0.15                   | 0.11 | 0.02        | 0.11 | 0.02                 | 0.11 | 0.23*                  | 0.11 | 0.02                 | 0.11 |
| Socioeconomic*Israel             | -0.01                  | 0.06 | 0.08        | 0.06 | -0.12*               | 0.06 | -0.13*                 | 0.05 | -0.14*               | 0.06 |
| Socioeconomic*Turkey             | 0.00                   | 0.06 | -0.18**     | 0.06 | 0.08                 | 0.06 | 0.23***                | 0.05 | 0.18**               | 0.06 |
| R <sup>2</sup>                   | 0.11                   |      | 0.08        |      | 0.12                 |      | 0.18                   |      | 0.12                 |      |

Note: + $p < .10$ , \* $p < .05$ , \*\* $p < .01$ , \*\*\* $p < .001$
